# Supplementary material for: MORF9 Functions in Plastid RNA Editing with Tissue Specificity
Source: MDPI journal article supplement (doi:10.3390/ijms20184635), 2019-09-19
Supplement: s1 [file s1]

**Supplemental Table S1 List of the primers used in the experiment**

|    | Primer              | sequence                                   | usage         | Amplicon size (bp) |
|----|---------------------|--------------------------------------------|---------------|--------------------|
| 1  | <i>accD-FP</i>      | ATGGAAAAATCGTGGTTC AATTTTATGTT             | RNA editing   | 400                |
|    | <i>accD-RP</i>      | GTTTGTCTAGTCTAATTTGAACTTCCCC               | RNA editing   |                    |
| 2  | <i>atpF-FP</i>      | TTAACCGATTCTTTTCGTTTACTTG                  | RNA editing   | 555                |
|    | <i>atpF-RP</i>      | CAAACATCCCAATATTTGCATTAA                   | RNA editing   |                    |
| 3  | <i>clpP-FP</i>      | TATTGGCGTTCCAAAAGTACCTT                    | RNA editing   | 591                |
|    | <i>clpP-RP</i>      | GAACCGCTACAAGATCAACAATTC                   | RNA editing   |                    |
| 4  | <i>matK-FP</i>      | ATAAATTTCAAGGATATTTAGAGTTTCG               | RNA editing   | 382                |
|    | <i>matK-RP</i>      | TTGACCAAATCATTAAAGATAAAGAATA               | RNA editing   |                    |
| 5  | <i>ndhB-FP</i>      | GCATGTACAGAATGAAAATTTTCATTCTC              | RNA editing   | 1168               |
|    | <i>ndhB-RP</i>      | AATCGCAATAATCGGGTTTCATT                    | RNA editing   |                    |
| 6  | <i>ndhD-FP</i>      | AACAACTCGAAGTATGGGTC                       | RNA editing   | 1083               |
|    | <i>ndhD-RP</i>      | CTAATGAGAGCACAAAATCAGGAT                   | RNA editing   |                    |
| 7  | <i>ndhF-FP</i>      | GGATCATACCTTTTCATTCCACTTC                  | RNA editing   | 471                |
|    | <i>ndhF-RP</i>      | GCAGCATGTATAAGAGCCGAAATG                   | RNA editing   |                    |
| 8  | <i>ndhG-FP</i>      | TTTGCTGGACCAATACATG                        | RNA editing   | 531                |
|    | <i>ndhG-RP</i>      | AGCCACAGAAATTGCACCTAT                      | RNA editing   |                    |
| 9  | <i>psbE-FP</i>      | ATGTCTGGAAGCACAGGAGA                       | RNA editing   | 252                |
|    | <i>psbE-RP</i>      | CTAAAACGATCTACTAAATTCATCGAG                | RNA editing   |                    |
| 10 | <i>psbF-FP</i>      | GATAGGACCTATCCAATTTTACAG                   | RNA editing   | 120                |
|    | <i>psbF-RP</i>      | CGTTGGATGAACTGCATTGC                       | RNA editing   |                    |
| 11 | <i>psbZ-FP</i>      | TGCTTTCCAATTGGCAGTTT                       | RNA editing   | 178                |
|    | <i>psbZ-RP</i>      | TCAAGAGATAAGAGAATTAAGGATACC                | RNA editing   |                    |
| 12 | <i>rpl23-FP</i>     | ATGGATGGAATCAAATATGC                       | RNA editing   | 264                |
|    | <i>rpl23-RP</i>     | TTAAGTTCTTTTCTTTCTAAGAGG                   | RNA editing   |                    |
| 13 | <i>rpoA F2-FP</i>   | CTCGGACACTACAGTGGAAGTGTG                   | RNA editing   | 253                |
|    | <i>rpoA F2</i>      | TTCTACGTGAAAATGTTCAATTTTGATAAG             | RNA editing   |                    |
| 14 | <i>rpoB 65F-FP</i>  | GGTTTTATCGGTTTATTGATCAGGG                  | RNA editing   | 2019               |
|    | <i>rpoB 65F-RP</i>  | CGGCGACCAATCCTTCCTAATTCAC                  | RNA editing   |                    |
| 15 | <i>rpoB-FP</i>      | TTCAGGTATCGACTTCAAAAGAAAC                  | RNA editing   | 2019               |
|    | <i>rpoB-RP</i>      | GGATACTCGGGTTCAAATACCC                     | RNA editing   |                    |
| 16 | <i>rpoC1-FP</i>     | CCTACTTTCTTACGATTACGAGGTT                  | RNA editing   | 1737               |
|    | <i>rpoC1-RP</i>     | ATGGGTCTCAACTCGGGAGG                       | RNA editing   |                    |
| 17 | <i>M9-1-LP</i>      | AGATGCTTCTATTCTTCCCCC                      | Mutant screen |                    |
|    | <i>M9-1-RP</i>      | ATTGTGTCCTGATTTCGTTGG                      | Mutant screen |                    |
| 18 | <i>LBb1.3/LP</i>    | ATTTTGCCGATTTTCGGAAC                       | Mutant screen |                    |
| 19 | <i>M9-FP</i>        | ATGGCTTCCTTCACAACAAC                       | qRT-PCR       |                    |
|    | <i>M9-RP</i>        | TCTTCCATGCTGCCAAGAACA                      | qRT-PCR       |                    |
| 20 | <i>MORF9-iGFP-F</i> | TGACCTCGAGACTAGTATGGCTTCCTTCAC<br>AACAAC   | subclone      |                    |
|    | <i>MORF9-iGFP-R</i> | AGGTGGAGGTCCCCCGGGAGAGGAATCAG<br>AGGCTGCTG | subclone      |                    |
