# Supplementary figures and images for: MORF9 Functions in Plastid RNA Editing with Tissue Specificity
Source: MDPI journal article supplement (doi:10.3390/ijms20184635), 2019-09-19

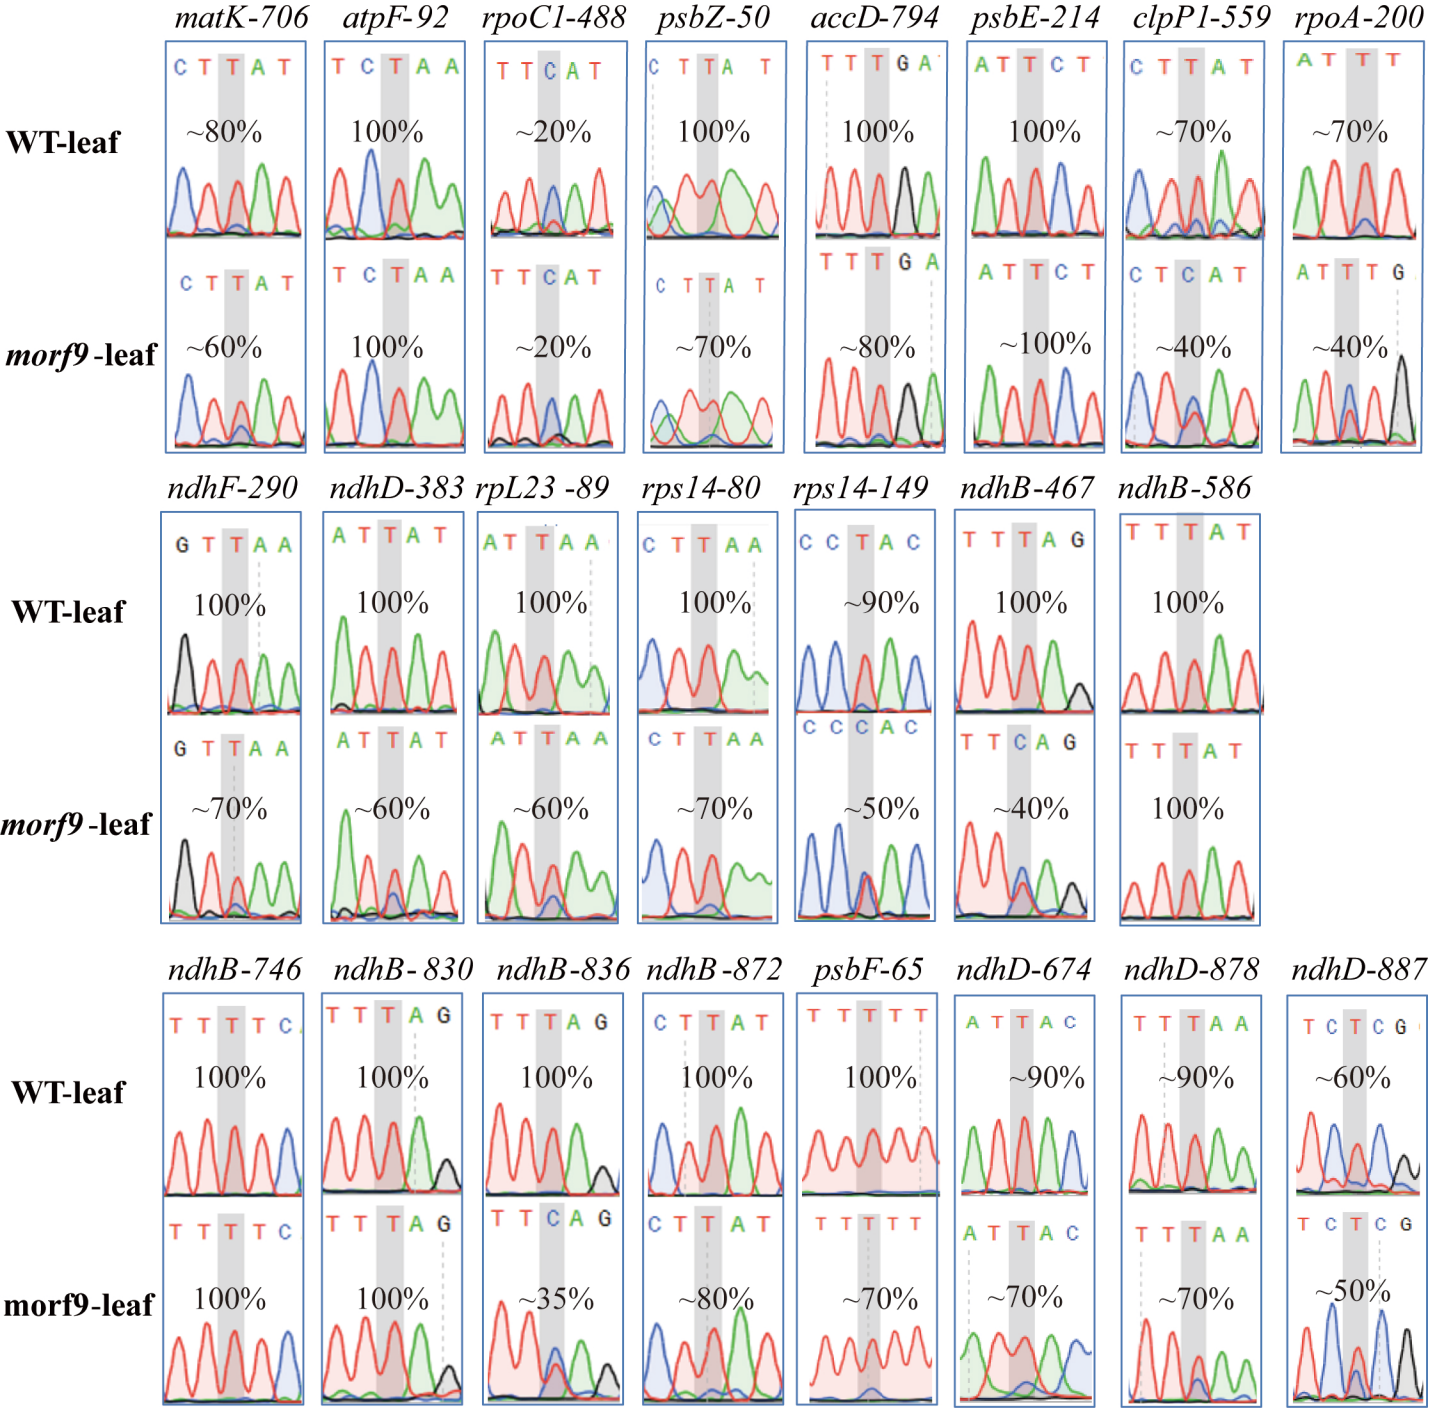

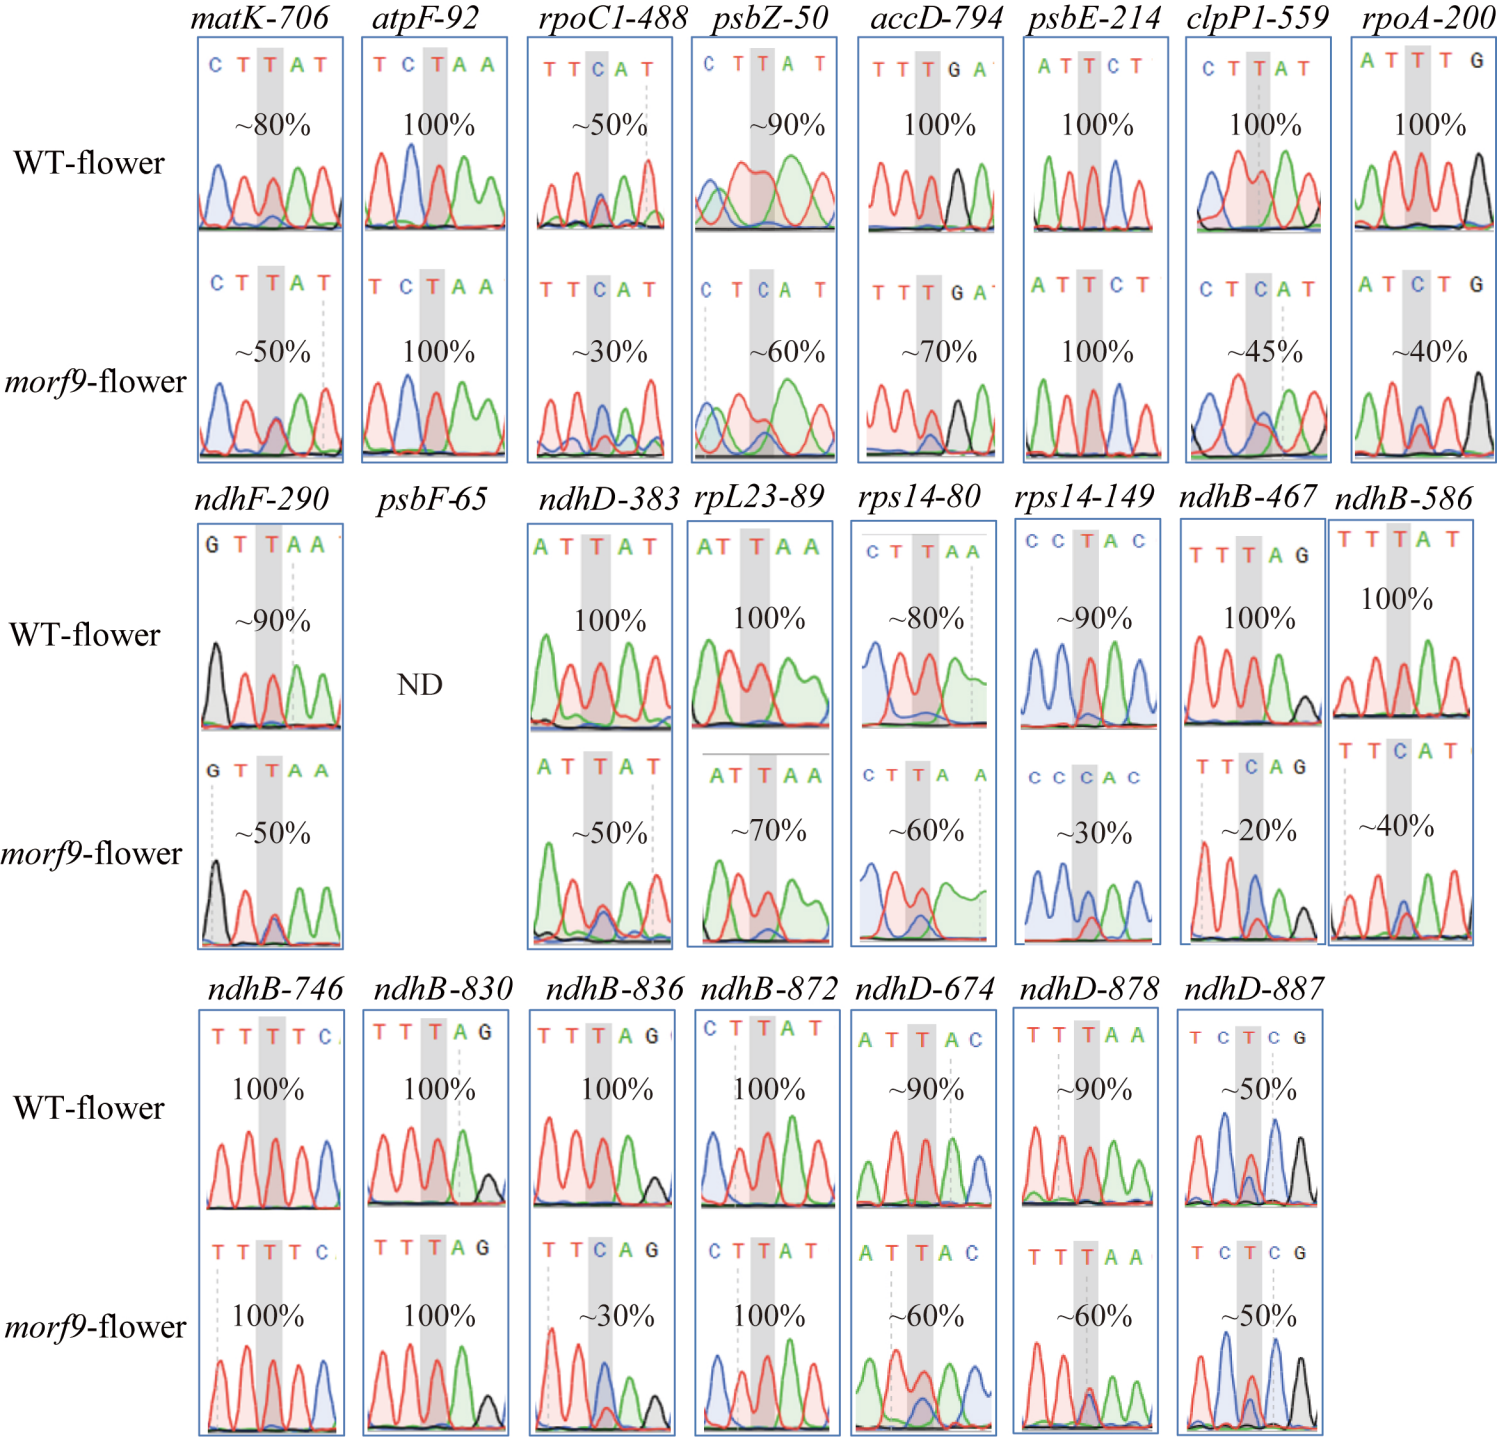

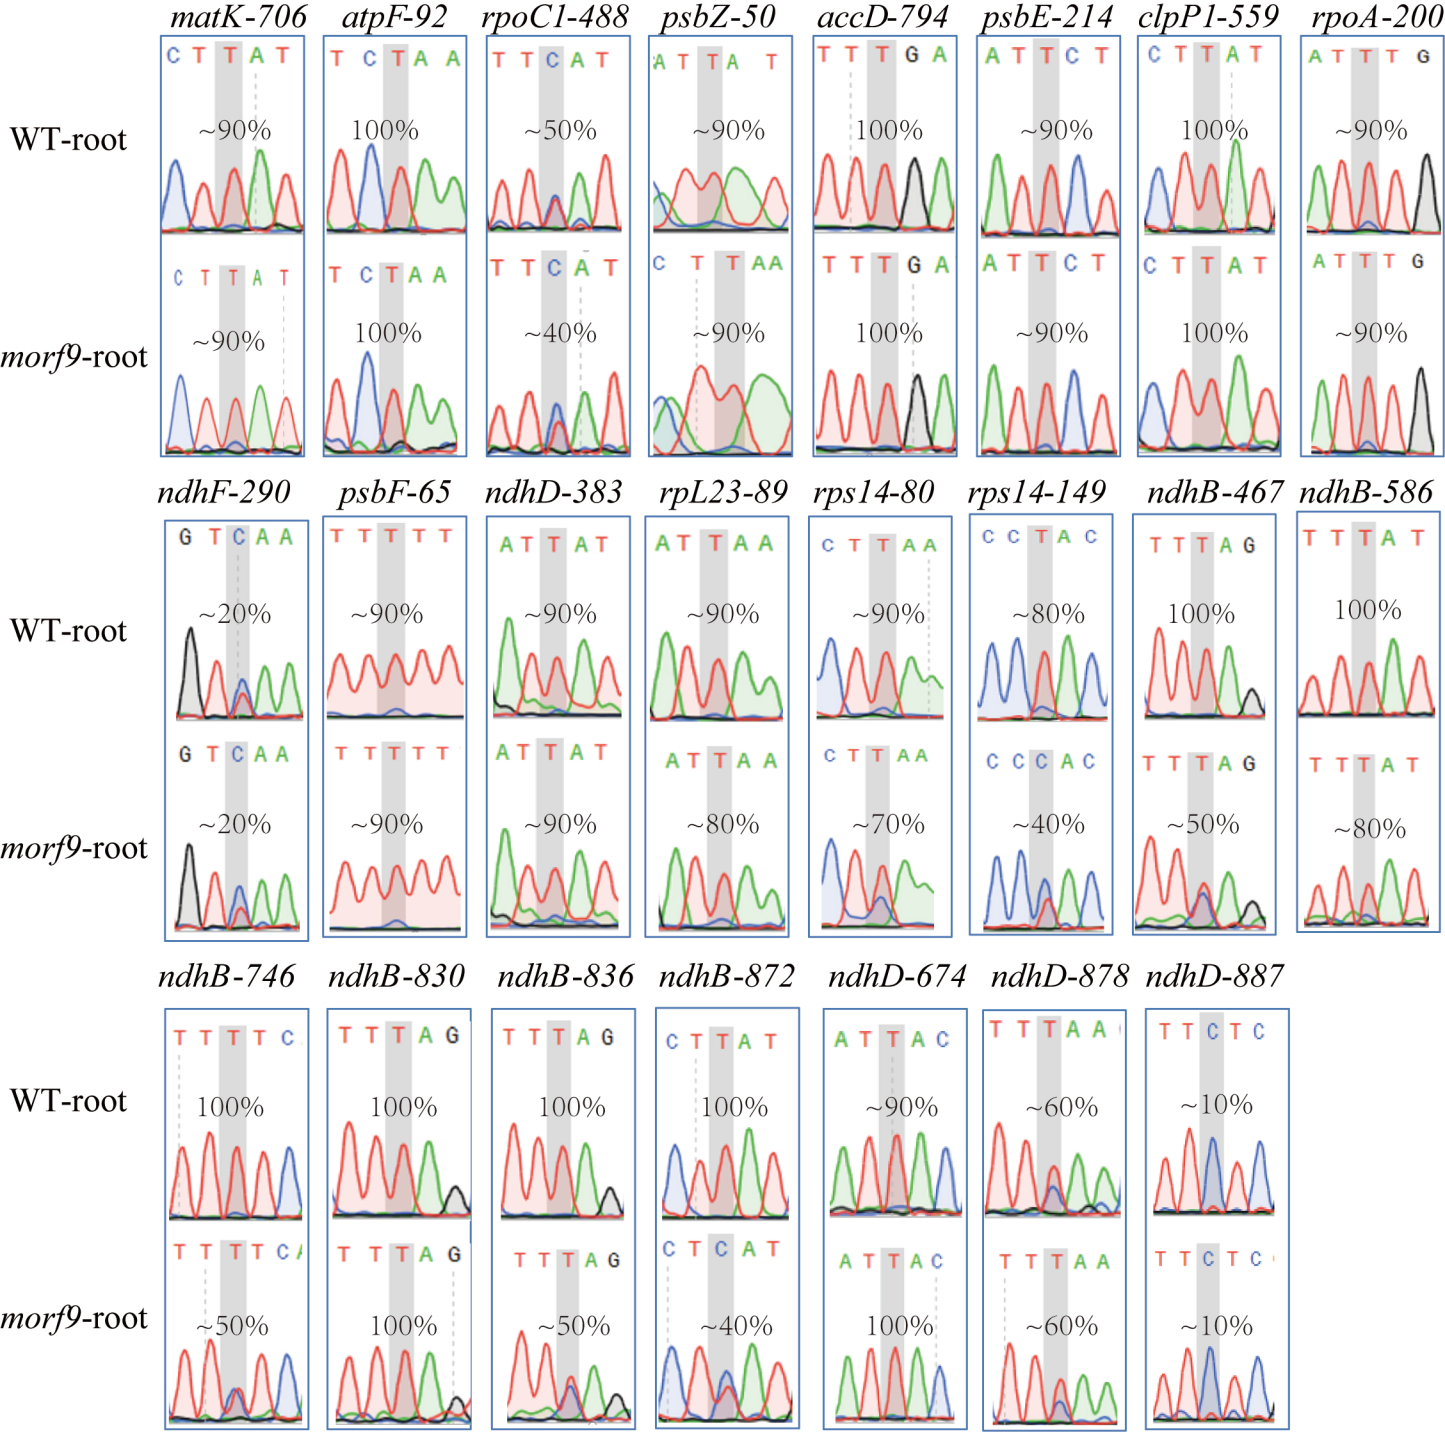

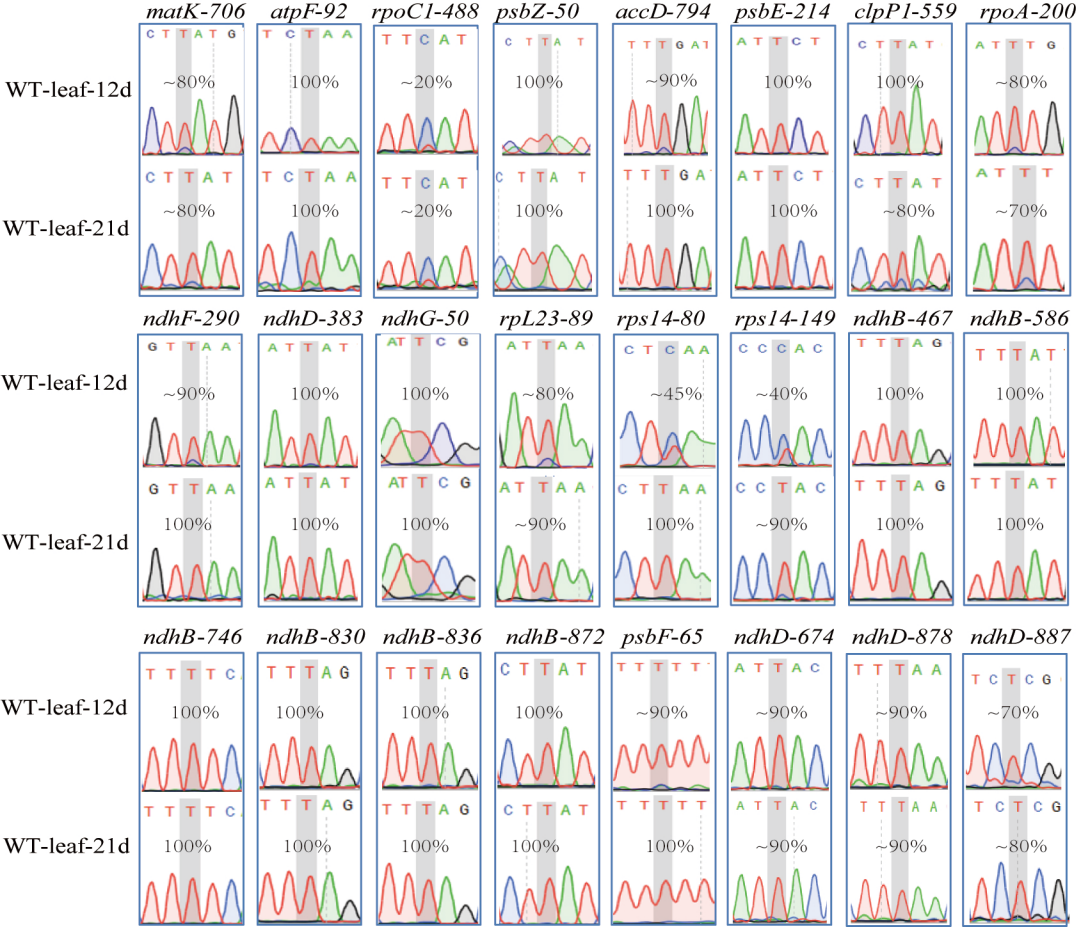

Supplement: s1 [file s1]

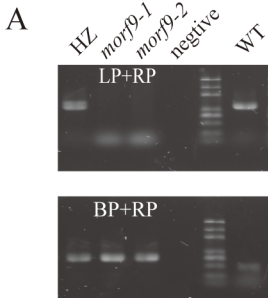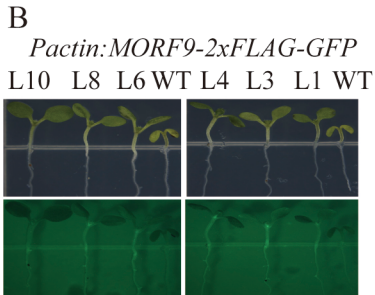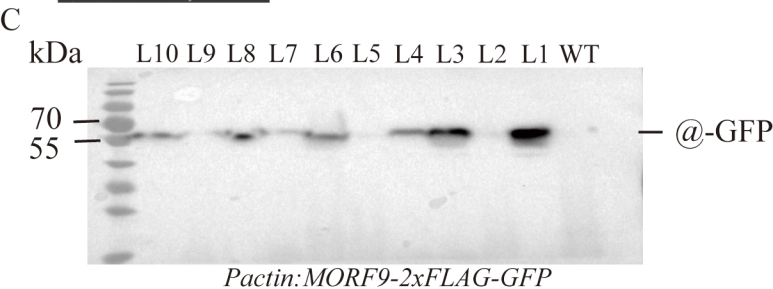

Supplement: s1 [file s1]
